# Supplementary material
Source: PubMed Central journal article supplement (PMC4292475)
Supplement: AEM.03018-14_zam999105979so1.pdf [file AEM.03018-14_zam999105979so1.pdf]

**Few highly abundant operational taxonomic units dominate within rumen  
methanogenic archaeal species in New Zealand sheep and cattle**

Henning Seedorf<sup>1</sup>, Sandra Kittelmann<sup>1</sup>, Peter H. Janssen<sup>1#</sup>

<sup>1</sup>AgResearch Ltd., Grasslands Research Centre, Palmerston North 4442, New Zealand

<sup>#</sup>Corresponding author. Mailing address: AgResearch Ltd., Grasslands Research Centre, Private Bag 11008, Palmerston North 4442, New Zealand. Phone: 64 6 351 8300. Fax: 64 6 351 8032. E-mail: [peter.janssen@agresearch.co.nz](mailto:peter.janssen@agresearch.co.nz)

**Supplemental Material**

## Supplemental Figures

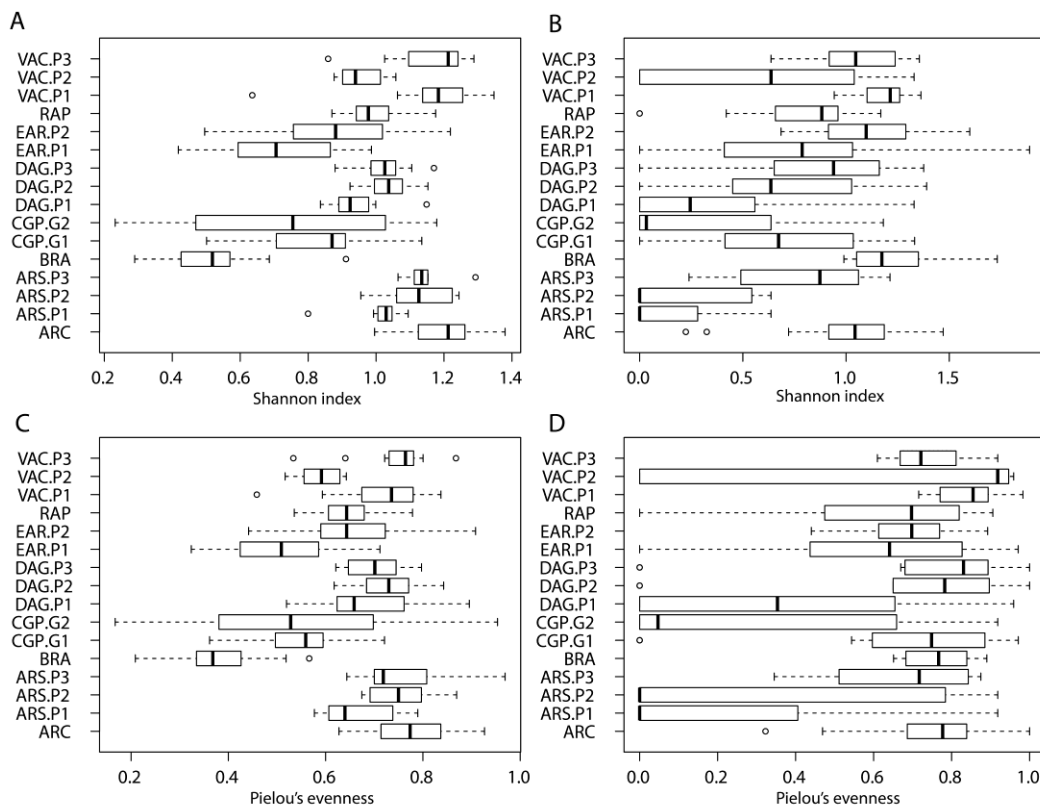

**FIG S1** Species diversity and evenness of methanogen communities in New Zealand ruminants. Shown are boxplot representations of species diversity (expressed as Shannon index) of (A) *Methanobacteriales* and (B) *Methanomassiliicoccales* for each of the sample groups. Panels C and D show boxplot representations of species evenness (expressed as Pielou's evenness index) of *Methanobacteriales* and *Methanomassiliicoccales*, respectively, for each sample group. Samples were rarefied to 190 reads. Whiskers represent the maximum and minimum values, outliers are indicated as open circles.

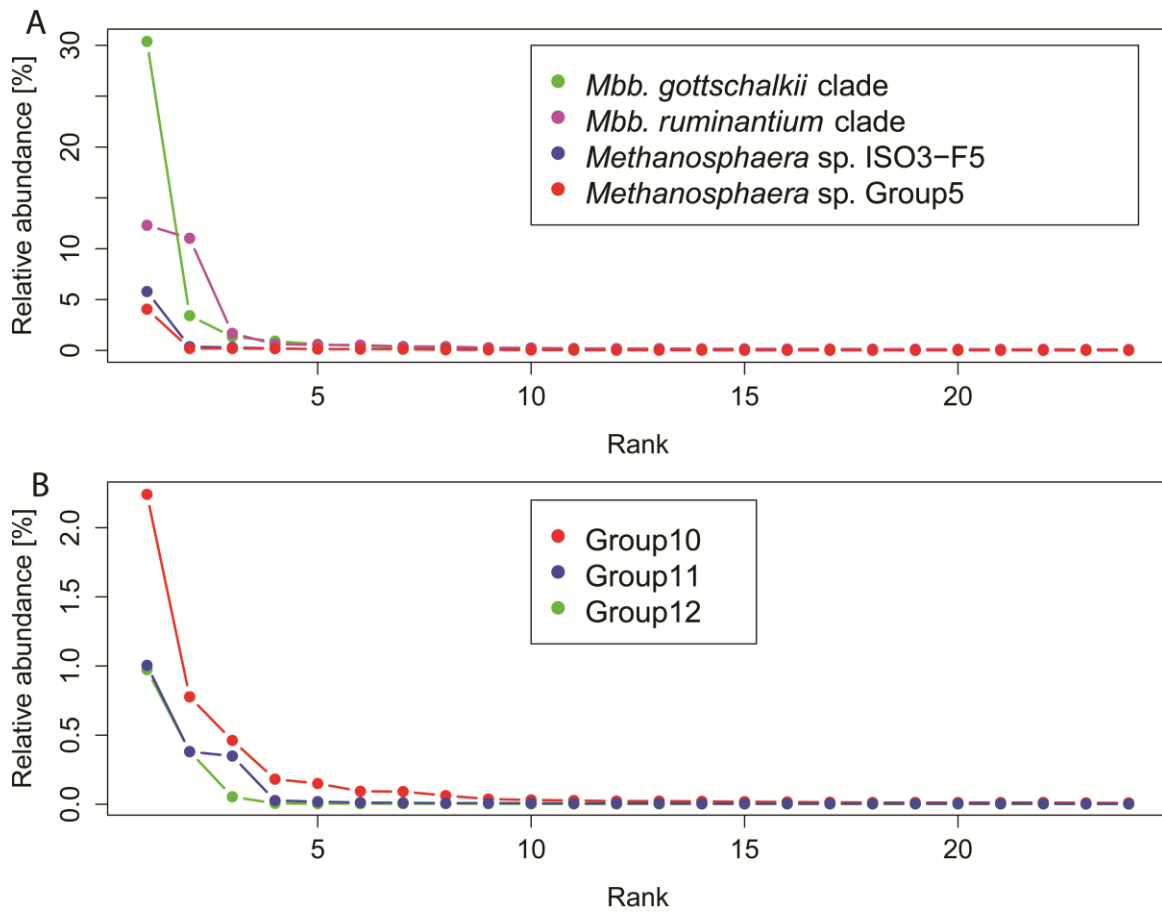

**FIG S2** Relative abundance of (A) *Methanobacteriales* OTUs and (B) *Methanomassiliicoccales* OTUs. Shown are the 25 most abundant OTUs of the most abundant species for each order ranked by relative abundance.

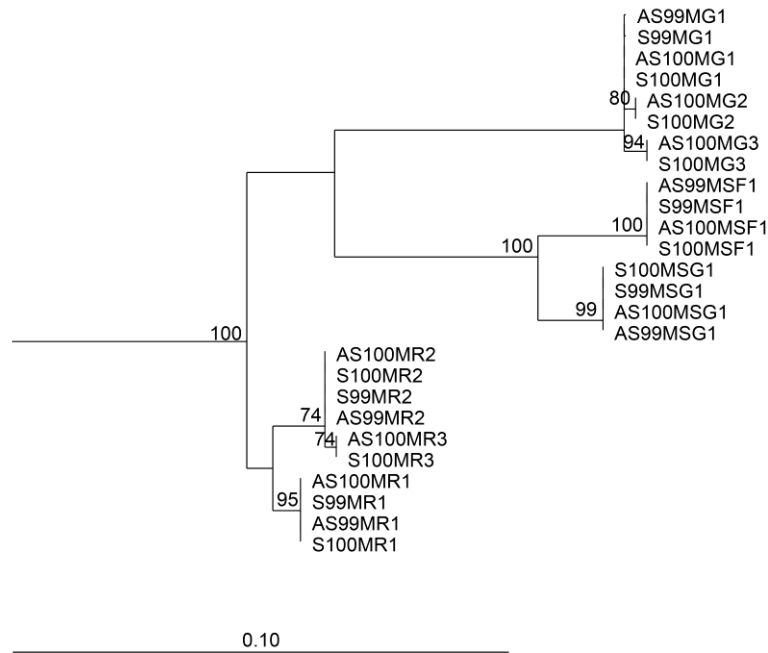

**FIG S3** Phylogeny of highly abundant *Methanobacteriales* OTUs constructed from reads prior to and after error correction and at different similarity cut-offs. OTU names indicate the four different ways they were constructed. OTUs starting with “AS” were constructed from error-corrected reads, OTUs starting with “S” from non-error corrected reads. Numbers following “AS” or “S” in the OTU-name indicate the similarity threshold for sequence clustering (“99” = 99% and “100” = 100%, respectively). Species clade designations of OTUs are indicated in the OTU-name by the following abbreviations: “MG” = *Methanobrevibacter gottschalkii* clade; “MR” = *Methanobrevibacter ruminantium* clade; “MSF” = *Methanosphaera* sp. ISO3-F5; “MSG” = *Methanosphaera* sp. Group5. For *Methanobrevibacter* species only most abundant OTUs from analyses that used 99% sequence similarity and the three most abundant OTUs from analyses that used 100% sequence similarity are shown. For *Methanosphaera* species, only the most abundant OTU from each analysis is shown. The dendrogram was rooted with five *Methanopyrus* sequences. The scale bar indicates 0.10 inferred nucleotide substitutions per position. For additional information about sequence similarity between OTUs, see Table S3.

A

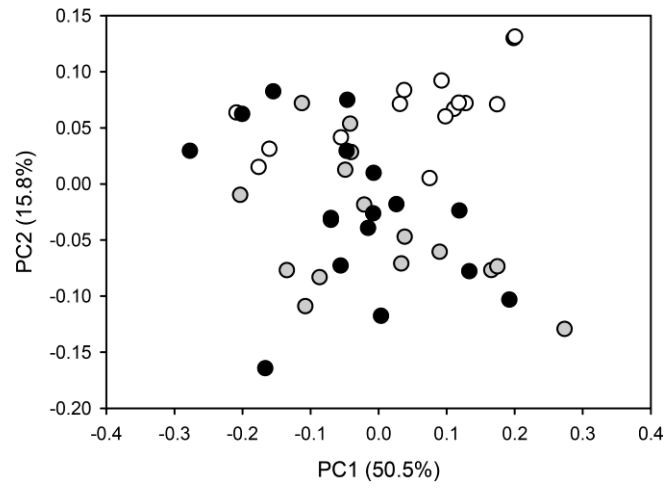

B

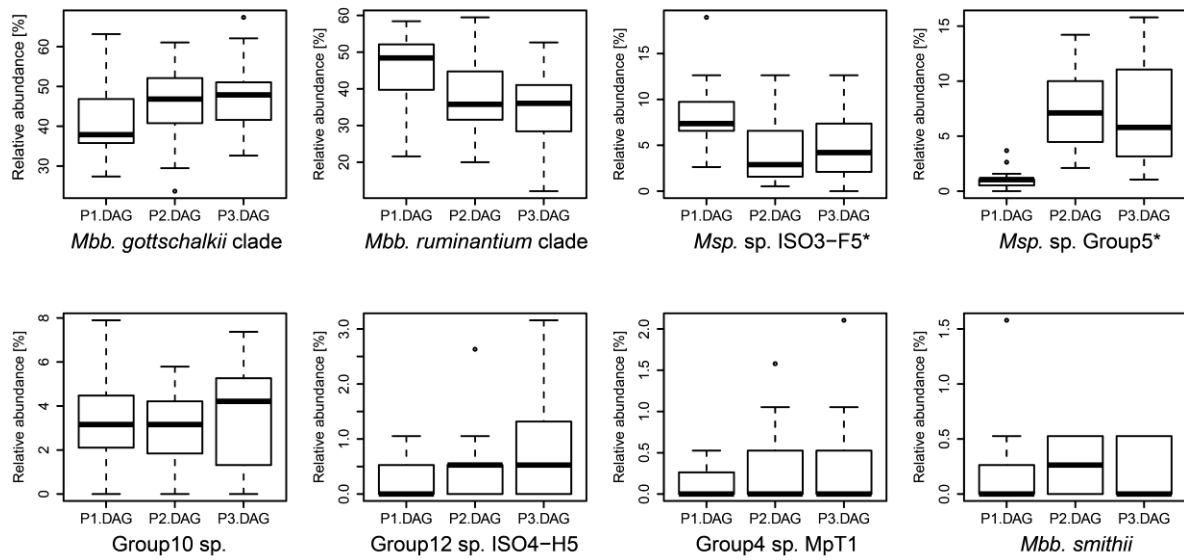

**FIG S4** Effects of seasons on methanogen community structure in animals on a pasture diet. (A) Principal coordinate analysis plot of Bray-Curtis dissimilarity distances. The open circles represent samples taken in April (sample group P1.DAG), the grey circles represent samples from the same animals taken in September (P2.DAG), and the black circles represent samples from these animals in October (P3.DAG). Samples were rarefied to 190 reads and calculations of Bray-Curtis-dissimilarities were performed on OTU-tables where OTUs had had been summarized to the species level. (B) Effect of season on the relative abundance of methanogen species. Shown are changes in the relative abundance of methanogens during serial treatments with different feeds (P1.DAG = April, P2.DAG = September, P3.DAG = October). Asterisks after the species name indicate statistically significant different species between P1.DAG and the two other periods, determined by one-way ANOVA followed by a TukeyHSD posthoc test ( $p < 0.05$ )).

## Supplemental Tables

**TABLE S1** Accession numbers for sequence data.

| Cohort | Database                    | Accession number                           |
|--------|-----------------------------|--------------------------------------------|
| ARC    | European Nucleotide Archive | ERP005201                                  |
| ARS    | European Nucleotide Archive | ERP005199                                  |
| BRA    | NCBI Sequence Read Archive  | PRJNA239421 (SRX478379 – SRX478388)        |
| CGP    | European Nucleotide Archive | ERP005200                                  |
| DAG    | MG-RAST                     | 4491446.3, 4491447.3, 4491448.3, 4491449.3 |
| EAR    | European Nucleotide Archive | ERP005194                                  |
| RAP    | NCBI Sequence Read Archive  | PRJNA239421 (SRX477717 – SRX477734)        |
| VAC    | European Nucleotide Archive | ERP005198                                  |

**TABLE S2** Similarities of abundant *Methanobacteriales* OTUs to *Methanobrevibacter* and *Methanosphaera* isolates. Listed are the similarities of (A) AS99MG1, (B) AS99MR1, (C) AS99MR2, (D) AS99MSF1, and (E) AS99MSG1.

A) *Methanobrevibacter gottschalkii* (AS99MG1)

| Accession | Sequence length | Sequence identity | Isolate                                          |
|-----------|-----------------|-------------------|--------------------------------------------------|
| GQ906575  | 110             | 100               | <i>Methanobrevibacter</i> sp. YE301              |
| GQ906572  | 110             | 100               | <i>Methanobrevibacter</i> sp. YE300              |
| GQ906573  | 110             | 100               | <i>Methanobrevibacter</i> sp. YE302              |
| GQ906574  | 110             | 100               | <i>Methanobrevibacter</i> sp. YE303              |
| GQ906576  | 110             | 100               | <i>Methanobrevibacter</i> sp. YE304              |
| DQ135988  | 454             | 99.78             | <i>Methanobrevibacter</i> sp. 1Y                 |
| EF112194  | 446             | 99.78             | <i>Methanobrevibacter</i> sp. 110                |
| EU863827  | 418             | 99.76             | <i>Methanobrevibacter</i> sp. LGM-AFM03          |
| U55238    | 457             | 99.34             | <i>Methanobrevibacter gottschalkii</i> strain HO |
| KF697730  | 464             | 99.34             | <i>Methanobrevibacter</i> sp. D5                 |
| EU919428  | 454             | 99.12             | <i>Methanobrevibacter</i> sp. WBY1               |
| U55239    | 456             | 98.90             | <i>Methanobrevibacter gottschalkii</i> strain PG |
| KF697729  | 453             | 98.68             | <i>Methanobrevibacter</i> sp. G16                |
| AJ009958  | 452             | 98.67             | <i>Methanobrevibacter</i> sp. SM9                |
| EU863830  | 420             | 98.57             | <i>Methanobrevibacter</i> sp. LGM-AFM06          |
| EU863828  | 420             | 98.57             | <i>Methanobrevibacter</i> sp. LGM-AFM04          |
| EU863829  | 419             | 98.33             | <i>Methanobrevibacter</i> sp. LGM-AFM05          |
| AY196673  | 454             | 98.24             | <i>Methanobrevibacter millerae</i> strain ZA-10  |
| U55236    | 437             | 97.25             | <i>Methanobrevibacter thaueri</i> strain CW      |

B) *Methanobrevibacter ruminantium* (AS99MR1)

| Accession | Sequence length | Sequence identity | Isolate                                           |
|-----------|-----------------|-------------------|---------------------------------------------------|
| AY196670  | 452             | 100               | <i>Methanobrevibacter</i> sp. Z4                  |
| AY196671  | 452             | 100               | <i>Methanobrevibacter</i> sp. Z6                  |
| AY196672  | 452             | 100               | <i>Methanobrevibacter</i> sp. Z8                  |
| EU863826  | 416             | 100               | <i>Methanobrevibacter</i> sp. LGM-AFM02           |
| AY615202  | 452             | 99.78             | <i>Methanobrevibacter</i> sp. AK-87               |
| DQ150253  | 422             | 99.29             | <i>Methanobrevibacter</i> sp. NY-1                |
| AY615204  | 452             | 99.12             | <i>Methanobrevibacter</i> sp. 62                  |
| AY615205  | 452             | 99.12             | <i>Methanobrevibacter</i> sp. 30Y                 |
| GQ906570  | 110             | 99.09             | <i>Methanobrevibacter</i> sp. YE286               |
| GQ906571  | 108             | 99.07             | <i>Methanobrevibacter</i> sp. YE287               |
| AJ009959  | 452             | 98.89             | <i>Methanobrevibacter</i> sp. NT7                 |
| AY196666  | 452             | 98.89             | <i>Methanobrevibacter ruminantium</i> strain M1   |
| AY615201  | 451             | 98.89             | <i>Methanobrevibacter olleyae</i> strain KM1H5-1P |



|          |     |       |                                         |
|----------|-----|-------|-----------------------------------------|
| KF697726 | 448 | 98.88 | <i>Methanobrevibacter</i> sp. Alpaca    |
| KF697732 | 454 | 98.45 | <i>Methanobrevibacter</i> sp. YLM1      |
| EU863831 | 416 | 98.32 | <i>Methanobrevibacter</i> sp. LGM-AFM07 |
| EU863832 | 416 | 98.32 | <i>Methanobrevibacter</i> sp. LGM-AFM08 |
| EU863833 | 416 | 98.32 | <i>Methanobrevibacter</i> sp. LGM-AFM09 |

C) *Methanobrevibacter ruminantium* (AS99MR2)

| Accession | Sequence length | Sequence identity | Isolate                                           |
|-----------|-----------------|-------------------|---------------------------------------------------|
| EU863831  | 416             | 100               | <i>Methanobrevibacter</i> sp. LGM-AFM07           |
| EU863832  | 416             | 100               | <i>Methanobrevibacter</i> sp. LGM-AFM08           |
| EU863833  | 416             | 100               | <i>Methanobrevibacter</i> sp. LGM-AFM09           |
| GQ906570  | 110             | 100               | <i>Methanobrevibacter</i> sp. YE286               |
| GQ906571  | 108             | 100               | <i>Methanobrevibacter</i> sp. YE287               |
| KF697726  | 448             | 98.66             | <i>Methanobrevibacter</i> sp. Alpaca              |
| AY196670  | 452             | 98.45             | <i>Methanobrevibacter</i> sp. Z4                  |
| AY196671  | 452             | 98.45             | <i>Methanobrevibacter</i> sp. Z6                  |
| AY196672  | 452             | 98.45             | <i>Methanobrevibacter</i> sp. Z8                  |
| DQ150253  | 422             | 98.34             | <i>Methanobrevibacter</i> sp. NY-1                |
| EU863826  | 416             | 98.32             | <i>Methanobrevibacter</i> sp. LGM-AFM02           |
| AJ009959  | 452             | 98.23             | <i>Methanobrevibacter</i> sp. NT7                 |
| AY615201  | 451             | 98.23             | <i>Methanobrevibacter olleyae</i> strain KM1H5-1P |
| AY615202  | 452             | 98.23             | <i>Methanobrevibacter</i> sp. AK-87               |
| AY615204  | 452             | 98.01             | <i>Methanobrevibacter</i> sp. 62                  |
| AY615205  | 452             | 98.01             | <i>Methanobrevibacter</i> sp. 30Y                 |
| KF697732  | 454             | 97.79             | <i>Methanobrevibacter</i> sp. YLM1                |
| AY196666  | 452             | 97.79             | <i>Methanobrevibacter ruminantium</i> strain M1   |

D) *Methanosphaera* sp. ISO3-F5 (AS99MSF1)

| Accession | Sequence length | Sequence identity | Isolate                                       |
|-----------|-----------------|-------------------|-----------------------------------------------|
| KF697734  | 451             | 100               | <i>Methanosphaera</i> sp. ISO3-F5             |
| CP000102  | 452             | 96.45             | <i>Methanosphaera stadtmanae</i> strain MCB-3 |
| KF697728  | 447             | 95.97             | <i>Methanosphaera</i> sp. A4                  |
| HE582783  | 453             | 95.34             | <i>Methanosphaera cuniculi</i> strain 1R-7    |

E) *Methanosphaera* sp. Group5 (AS99MSG1)

---

|           | Sequence | Sequence |                                               |
|-----------|----------|----------|-----------------------------------------------|
| Accession | length   | identity | Isolate                                       |
| KF697734  | 451      | 97.34    | <i>Methanosphaera</i> sp. ISO3-F5             |
| KF697728  | 447      | 97.09    | <i>Methanosphaera</i> sp. A4                  |
| CP000102  | 452      | 96.67    | <i>Methanosphaera stadtmanae</i> strain MCB-3 |
| HE582783  | 453      | 96.67    | <i>Methanosphaera cuniculi</i> strain 1R-7    |

---

**TABLE S3** Effects of read error-correction and sequence clustering threshold on OTU abundance. For an explanation of OTU names see the legend of Fig. 4. Shown are the mean relative abundances of the OTUs, and in parenthesis are the sequence identities to the corresponding “AS99”-OTU (error corrected reads, 99% sequence similarity threshold), which is marked with an asterisk.

| Archaeal taxon                                   | Dominant OTUs: abundance (%) with different error corrections and sequence similarities for OTU construction                   |                                                   |                                                      |                                                       |
|--------------------------------------------------|--------------------------------------------------------------------------------------------------------------------------------|---------------------------------------------------|------------------------------------------------------|-------------------------------------------------------|
|                                                  | In parentheses are the sequence identities of representative sequences to the most abundant AS99 OTU (marked with an asterisk) |                                                   |                                                      |                                                       |
|                                                  | Reads error corrected<br>99% sequence similarity                                                                               | Reads error corrected<br>100% sequence similarity | Reads not error corrected<br>99% sequence similarity | Reads not error corrected<br>100% sequence similarity |
| <i>Methanobrevibacter gottschalkii</i> clade     | AS99MG1: 30.4%*                                                                                                                | AS100MG1: 6.2% (100%)                             | S99MG1: 28.1% (100%)                                 | S100MG1: 5.2% (100%)                                  |
|                                                  |                                                                                                                                | AS100MG2: 5.0% (99.78%)                           |                                                      | S100MG2: 4.0% (99.78%)                                |
|                                                  |                                                                                                                                | AS100MG3: 2.3% (99.56%)                           |                                                      | S100MG3: 1.9% (99.56%)                                |
| <i>Methanobrevibacter ruminantium</i> clade OTU1 | AS99MR1: 12.3%*                                                                                                                | AS100MR1: 8.9% (100%)                             | S99MR1: 11.6% (100%)                                 | S100MR1: 6.9% (100%)                                  |
|                                                  | AS99MR2: 11.0% (98.45%)                                                                                                        | AS100MR2: 3.0% (98.45)                            | S99MR2: 10.2% (98.45%)                               | S100MR2: 2.4% (98.45%)                                |
|                                                  |                                                                                                                                | AS100MR3: 2.9% (98.23%)                           |                                                      | S100MR3: 2.2% (98.23%)                                |
| <i>Methanobrevibacter ruminantium</i> clade OTU2 | AS99MR2: 11.0%*                                                                                                                | AS100MR2: 3.0% (100%)                             | S99MR2: 10.2% (100%)                                 | S100MR2: 2.4% (100%)                                  |
|                                                  | AS99MR1: 12.3% (98.45%)                                                                                                        | AS100MR3: 2.9% (99.78%)                           | S99MR1: 11.6% (98.45%)                               | S100MR3: 2.2% (99.78%)                                |
|                                                  |                                                                                                                                | AS100MR1: 8.9% (98.45)                            |                                                      | S100MR1: 6.9% (98.45%)                                |
| <i>Methanosphaera</i> sp. ISO3-F5                | AS99MSF1: 5.8%*                                                                                                                | AS100MSF1: 2.6% (100%)                            | S99MSF1: 5.5% (100%)                                 | S100MSF1: 1.7% (100%)                                 |
| <i>Methanosphaera</i> sp. Group5                 | AS99MSG1: 4.1%*                                                                                                                | AS100MSG1: 2.3% (100%)                            | S99MSG1: 3.9% (100%)                                 | S100MSG1: 1.7% (100%)                                 |

**TABLE S4** Similarity of abundant *Methanomassiliicoccales* OTUs to *Methanomassiliicoccales* sequences. Listed are the similarities of (A) AS99ML1, (B) AS99ML2, and (C) AS99ML3.

A) *Methanomassiliicoccales* OTU 1 (AE99ML1)

| Accession | Sequence length | Sequence identity | Isolate                     |
|-----------|-----------------|-------------------|-----------------------------|
| AY995293  | 450             | 100               | clone CSIRO-Qld25           |
| EF055545  | 450             | 100               | clone LGMJN56               |
| EF055543  | 450             | 100               | clone LGMJN54               |
| EF541187  | 450             | 100               | Uncultured archaeon clone 7 |
| EU413576  | 450             | 100               | clone SRmetE17              |
| EU413586  | 439             | 100               | clone SRmetE31              |
| EU413604  | 450             | 100               | clone SRmetF7               |
| FJ919262  | 450             | 100               | clone M13                   |
| FJ919251  | 450             | 100               | clone M2                    |
| FJ919269  | 450             | 100               | clone M20                   |
| JF302256  | 450             | 100               | clone AP6-001               |
| JF302296  | 450             | 100               | clone AP6-049               |
| JF807178  | 450             | 100               | clone QTPYAK2               |
| EF055544  | 450             | 99.78             | clone LGMJN55               |
| EF541182  | 450             | 99.78             | clone 2                     |
| EU413575  | 450             | 99.78             | clone SRmetE16              |
| HM038377  | 450             | 99.78             | clone MLR 15                |
| HM038382  | 449             | 99.78             | clone MLR 20                |
| JF302355  | 450             | 99.78             | clone AP6-143               |
| JF807215  | 450             | 99.78             | clone QTPYAK39              |
| JF807217  | 450             | 99.78             | clone QTPYAK41              |
| JF807216  | 450             | 99.78             | clone QTPYAK40              |
| EF055542  | 450             | 99.56             | clone LGMJN53               |
| FJ938102  | 450             | 99.56             | clone 26                    |
| JF807177  | 450             | 99.56             | clone QTPYAK1               |
| JF807210  | 450             | 99.56             | clone QTPYAK34              |
| JF807211  | 450             | 99.33             | clone QTPYAK35              |
| GQ339877  | 450             | 95.11             | Methanogenic archaeon WGK1  |
| DQ445723  | 421             | 95.01             | Group9 sp. CH1270           |
| GQ339876  | 450             | 94.22             | Methanogenic archaeon DCM1  |
| JX266068  | 450             | 94.00             | MPT1                        |
| KF697736  | 401             | 92.52             | ISO4-G1                     |

|          |     |       |                                                                  |
|----------|-----|-------|------------------------------------------------------------------|
| AB749767 | 450 | 92.44 | Thermoplasmata archaeon Kjm51a                                   |
| GQ339875 | 450 | 90.89 | Methanogenic archaeon CRM1                                       |
| KF697735 | 450 | 90.89 | ISO4-H5                                                          |
| CP002916 | 450 | 90.89 | Thermoplasmatales archaeon BRNA1                                 |
| CP004049 | 450 | 89.56 | Candidatus <i>Methanomethylophilus alvus</i> Mx1201              |
| HQ896499 | 452 | 89.33 | <i>Methanomassiliococcus luminyensis</i> strain B10              |
| CP005934 | 450 | 89.33 | Candidatus <i>Methanomassiliococcus intestinalis</i> Issoire-Mx1 |
| KF697737 | 400 | 89.00 | ISO4-G11                                                         |

B) *Methanomassiliococcales* OTU 2 (AE99ML2)

| Accession | Sequence length | Sequence identity | Isolate/clone                                       |
|-----------|-----------------|-------------------|-----------------------------------------------------|
| JF682961  | 450             | 100               | clone UVM-H075                                      |
| JF683103  | 450             | 100               | clone UVM-J037                                      |
| KF697735  | 450             | 100               | ISO4-H5                                             |
| JF807289  | 450             | 99.78             | clone QTPYAK113                                     |
| JF807290  | 450             | 99.78             | clone QTPYAK114                                     |
| JF807265  | 450             | 99.78             | clone QTPYAK89                                      |
| EU413587  | 450             | 99.78             | clone SRmetE32                                      |
| EU413597  | 450             | 99.78             | clone SRmetE46                                      |
| EU413645  | 450             | 99.78             | clone SRmetG19                                      |
| JF682950  | 450             | 99.78             | clone UVM-H062                                      |
| EU413605  | 441             | 99.77             | clone SRmetF11                                      |
| EU413660  | 441             | 99.77             | clone SRmetG39                                      |
| JF807285  | 450             | 99.56             | clone QTPYAK109                                     |
| EU413616  | 450             | 99.56             | clone SRmetF26                                      |
| EU413618  | 450             | 99.56             | clone SRmetF28                                      |
| JF682920  | 450             | 99.33             | clone UVM-H032                                      |
| DQ123869  | 450             | 99.11             | clone PE-CAN.09                                     |
| JF682948  | 450             | 99.11             | clone UVM-H060                                      |
| CP004049  | 450             | 96.44             | Candidatus <i>Methanomethylophilus alvus</i> Mx1201 |
| GQ339875  | 450             | 95.56             | Methanogenic archaeon CRM1                          |
| CP002916  | 450             | 95.56             | Thermoplasmatales archaeon BRNA1                    |
| KF697737  | 400             | 94.25             | ISO4-G11                                            |
| GQ339876  | 450             | 93.56             | Methanogenic archaeon DCM1                          |
| GQ339877  | 450             | 92.67             | Methanogenic archaeon WGK1                          |
| KF697736  | 401             | 92.52             | ISO4-G1                                             |
| JX266068  | 450             | 92.22             | MPT1                                                |

|          |     |       |                                                                  |
|----------|-----|-------|------------------------------------------------------------------|
| DQ445723 | 421 | 91.69 | Group9 sp. CH1270                                                |
| AB749767 | 450 | 91.33 | Thermoplasmata archaeon Kjm51a                                   |
| CP005934 | 450 | 86.22 | Candidatus <i>Methanomassiliococcus intestinalis</i> Issoire-Mx1 |
| HQ896499 | 452 | 86.00 | <i>Methanomassiliococcus luminyensis</i> strain B10              |

---

C) *Methanomassiliococcales* OTU 3 (AE99ML3)

| Accession | Sequence length | Sequence identity | Isolate/clone                                                    |
|-----------|-----------------|-------------------|------------------------------------------------------------------|
| CP004049  | 450             | 98.89             | Candidatus <i>Methanomethylophilus alvus</i> Mx1201              |
| KF697735  | 450             | 97.11             | ISO4-H5                                                          |
| GQ339875  | 450             | 96.67             | Methanogenic archaeon CRM1                                       |
| CP002916  | 450             | 96.67             | Thermoplasmatales archaeon BRNA1                                 |
| GQ339876  | 450             | 94.67             | Methanogenic archaeon DCM1                                       |
| KF697737  | 400             | 94.50             | ISO4-G11                                                         |
| GQ339877  | 450             | 93.78             | Methanogenic archaeon WGK1                                       |
| JX266068  | 450             | 92.89             | MPT1                                                             |
| AB749767  | 450             | 92.44             | Thermoplasmata archaeon Kjm51a                                   |
| DQ445723  | 421             | 92.40             | Group9 sp. CH1270                                                |
| KF697736  | 401             | 92.02             | ISO4-G1                                                          |
| CP005934  | 450             | 86.44             | Candidatus <i>Methanomassiliococcus intestinalis</i> Issoire-Mx1 |
| HQ896499  | 452             | 85.56             | <i>Methanomassiliococcus luminyensis</i> strain B10              |

---

**Table S5** Mismatches of primers Ar915aF and Ar1386R to primer binding sites. Reference sequences in RIM-DB were searched for mismatches to the primers used in this study. Only sequences extending beyond the primer binding site were included in the analysis. Listed are mismatches for (A) primer Ar915aF and (B) primer Ar1386R.

| A) Primer Ar915aF              |                  |            |            |              |               |
|--------------------------------|------------------|------------|------------|--------------|---------------|
| Order                          | No. of sequences | 0 mismatch | 1 mismatch | 2 mismatches | ≥3 mismatches |
| <i>Methanopyrales</i>          | 5                | 100.0%     | 0.0%       | 0.0%         | 0.0%          |
| <i>Methanococcales</i>         | 75               | 97.3%      | 0.0%       | 1.3%         | 1.3%          |
| <i>Methanobacteriales</i>      | 771              | 98.0%      | 1.6%       | 0.3%         | 0.1%          |
| <i>Methanomassiliicoccales</i> | 194              | 99.5%      | 0.5%       | 0.0%         | 0.0%          |
| <i>Methanomicrobiales</i>      | 545              | 97.6%      | 2.2%       | 0.0%         | 0.2%          |
| <i>Methanocellales</i>         | 29               | 93.1%      | 6.9%       | 0.0%         | 0.0%          |
| <i>Methanosarcinales</i>       | 696              | 97.0%      | 2.6%       | 0.0%         | 0.4%          |

  

| B) Primer Ar1386R              |                  |            |            |              |               |
|--------------------------------|------------------|------------|------------|--------------|---------------|
| Order                          | No. of sequences | 0 mismatch | 1 mismatch | 2 mismatches | ≥3 mismatches |
| <i>Methanopyrales</i>          | 5                | 100.0%     | 0.0%       | 0.0%         | 0.0%          |
| <i>Methanococcales</i>         | 58               | 94.8%      | 5.2%       | 0.0%         | 0.0%          |
| <i>Methanobacteriales</i>      | 182              | 98.4%      | 1.1%       | 0.6%         | 0.0%          |
| <i>Methanomassiliicoccales</i> | 106              | 98.1%      | 1.9%       | 0.0%         | 0.0%          |
| <i>Methanomicrobiales</i>      | 412              | 98.8%      | 1.2%       | 0.0%         | 0.0%          |
| <i>Methanocellales</i>         | 27               | 100.0%     | 0.0%       | 0.0%         | 0.0%          |
| <i>Methanosarcinales</i>       | 334              | 96.7%      | 2.4%       | 0.6%         | 0.3%          |
